# Supplementary material for: Segmentation strategy of de novo designed four-helical bundles expands protein oligomerization modalities for cell regulation
Source: PubMed Central journal article supplement (PMC10082849; doi:10.1038/s41467-023-37765-6), 2023-04-08
Supplement: 41467_2023_37765_MOESM4_ESM.pdf [file 41467_2023_37765_MOESM4_ESM.pdf]

**Title: Supplementary Data 1:**

**Description: A list and sequences of all constructs used or designed in this study.** Amino acid or DNA sequences for all used constructs in the manuscript are divided into topical groups with function-annotated parts of the sequences.
